# Supplementary material
Source: publisher figshare collection journal article supplement (https://diabetesjournals.figshare.com/articles/dataset/_/28500572)
Supplement: Supplementary file 2 [file 1]

**Supplementary Table S1. List of Human Islets Donor Information. Related to Figures 1C, 1D, 5H, 5I, 6A, and S1A.**

|    | Donor (RRID)  | Age (years) | Sex    | BMI   | Disease                            |
|----|---------------|-------------|--------|-------|------------------------------------|
| 1  | SAMN25519947  | 32          | Male   | 24.3  | Non-diabetic                       |
| 2  | SAMN26646319  | 20          | Male   | 20.5  | Non-diabetic                       |
| 3  | SAMN27361473  | 34          | Male   | 31.8  | Non-diabetic                       |
| 4  | SAMN29771427  | 44          | Male   | 27.9  | Non-diabetic                       |
| 5  | SAMN32641506  | 16          | Male   | 29.5  | Non-diabetic                       |
| 6  | SAMN38518088  | 57          | Female | 30.1  | Non-diabetic                       |
| 7  | SAMN38334492  | 51          | Male   | 24.6  | Non-diabetic                       |
| 8  | SAMN38226661  | 37          | Female | 30    | Non-diabetic                       |
| 9  | SAMN37973608  | 55          | Female | 31.7  | Non-diabetic                       |
| 10 | SAMN37871873  | 59          | Male   | 41.7  | Non-diabetic                       |
| 11 | SAMN36823227  | 41          | Female | 38.4  | Non-diabetic                       |
| 12 | SAMN35301006  | 52          | Male   | 31.6  | Non-diabetic                       |
| 13 | SAMN34411471  | 45          | Male   | 33.1  | Non-diabetic                       |
| 14 | SAMN34033793  | 39          | Male   | 33.4  | Non-diabetic                       |
| 15 | SAMN33103085  | 49          | Female | 27.5  | Non-diabetic                       |
| 16 | SAMN34033793  | 39          | Male   | 33.4  | Non-diabetic                       |
| 17 | UNOSIDAKE4447 | 27          | Male   | 29.79 | Type 1 Diabetic (10 years)         |
| 18 | SAMN37680485  | 63          | male   | 33.9  | Type 2 Diabetic (>10 years)        |
| 19 | SAMN36020139  | 46          | Female | 27.5  | Type 2 Diabetic (0-5 years)        |
| 20 | SAMN33293779  | 49          | Male   | 68.5  | Type 2 Diabetic (Duration unknown) |
| 21 | SAMN25980818  | 55          | Male   | 31    | Type 2 diabetic (0-5 years)        |
| 22 | SAMN39639181  | 58          | Male   | 38.3  | Type 2 diabetic (6-10 years)       |
| 23 | SAMN32273466  | 45          | Female | 33.5  | Type 2 diabetic (Duration unknown) |
| 24 | SAMN40122446  | 63          | Male   | 36    | Type 2 diabetic (>10 years)        |
| 25 | SAMN39243818  | 68          | Male   | 25.2  | Type 2 diabetic (>10 years)        |
| 26 | SAMN40593976  | 43          | Male   | 29.8  | Type 2 diabetic                    |

**Supplementary Table S2. Antibody information. Related to Figures 2J, 3H, 3N, 4A, 4E and 5D.**

| Target                | Primary Antibody (Dilution)                                   | Secondary Antibody (1:1000 dilution) |
|-----------------------|---------------------------------------------------------------|--------------------------------------|
| Nidogen-2             | Rat Monoclonal Antibody (1:50)                                | Anti-Rat Alexa fluor 633             |
| GLUT4                 | Polyclonal Rabbit GLUT4 Antibody (1:100)                      | Anti-Rabbit Alexa fluor 488          |
| $\alpha$ -sarcoglycan | Monoclonal mouse $\alpha$ -sarcoglycan Antibody (F-7) (1:100) | Anti-mouse Alexa fluor 594           |
| UCP1                  | monoclonal rabbit UCP1 antibody (1:50)                        | Anti-Rabbit Alexa fluor 488          |
| Insulin               | Monoclonal Mouse Insulin Antibody (1:100)                     | Anti-mouse Alexa fluor 568           |
| Somatostatin          | Monoclonal Rat Somatostatin Antibody (1:50)                   | Anti-Rat Alexa fluor 633             |
| Glucagon              | Rabbit GluN F7 (1:100)                                        | Anti-Rabbit Alexa fluor 488          |

**Supplementary Table S3. Primers for qPCR amplification. Related to Figures 3G, 3I, 3M, 3O, 4D, and S2L.**

| <b>Target</b> | <b>Gene Name</b>                             | <b>Forward primer</b>       | <b>Reverse Primer</b>      |
|---------------|----------------------------------------------|-----------------------------|----------------------------|
| <i>Ucp1</i>   | Uncoupling protein 1                         | GATGGTGAACCCGACAAC<br>TT    | AGCACACAAACATGATGAC<br>GT  |
| <i>18S</i>    | Small subunit 18 rRNA                        | GTAACCCGTTGAACCCCA<br>TT    | CCATCCAATCGGTAGTAGC<br>G   |
| <i>Cidea</i>  | Cell Death Inducing DFFA-<br>Like Effector A | TGCTCTTCTGTATCGCCCA<br>GT   | GCCGTGTTAAGGAATCTGC<br>TG  |
| <i>Zic1</i>   | Zic Family Member 1                          | AACCTCAAGATCCACAAA<br>AGGA  | CCTCGAACTCGCACTTGAA        |
| <i>Prdm16</i> | PR/SET Domain 16                             | CAGCACGGTGAAGCCATT<br>C     | GCGTGCATCCGCTTGTG          |
| <i>Rbp4</i>   | Retinol binding protein 4                    | TGTAGCCTCCTTTCTCCAG<br>CG   | ACAGGTGCCATCCAGATTC<br>TG  |
| <i>Cxcl14</i> | Chemokine(C-X-C motif)<br>ligand 14          | TACCCACACTGCGAGGAG<br>AAG   | CGCTTCTCGTTCCAGGCATT<br>G  |
| <i>Trarg1</i> | Trafficking regulator of<br>GLUT4-1          | TGGCACGGCTACTCAGCA<br>TCA   | TGCCTCTGCTAGAAACAGC<br>TCC |
| <i>Glut4</i>  | Glucose transporter type 4                   | GGTGTGGTCAATACGGTC<br>TTCAC | AGCAGAGCCACGGTCATCA<br>AGA |

**Supplementary Table S4. RNAseq Top 15 DEGs from DESeq2 of CB-100 treated versus sham-treated NOD Mouse's ingWAT. Related to Figure 3D.**

| Gene Symbol          | BaseMean          | log2<br>FoldChange | lfcSE             | Stat              | pvalue            | padj              | Note               |
|----------------------|-------------------|--------------------|-------------------|-------------------|-------------------|-------------------|--------------------|
| <b>Prr32</b>         | <b>98.984989</b>  | <b>9.89392454</b>  | <b>1.56387026</b> | <b>6.32656353</b> | <b>2.5068E-10</b> | <b>6.4319E-09</b> | <b>upregulated</b> |
| <b>Sprr2a3</b>       | <b>84.7456472</b> | <b>9.67043129</b>  | <b>1.87952704</b> | <b>5.14514082</b> | <b>2.6732E-07</b> | <b>3.1905E-06</b> | <b>upregulated</b> |
| <b>Sprr2f</b>        | <b>71.8354655</b> | <b>9.43189703</b>  | <b>1.87675419</b> | <b>5.02564324</b> | <b>5.0175E-07</b> | <b>5.5401E-06</b> | <b>upregulated</b> |
| <b>Sprr1a</b>        | <b>237.263237</b> | <b>7.96854276</b>  | <b>1.12842095</b> | <b>7.06167566</b> | <b>1.6451E-12</b> | <b>7.0183E-11</b> | <b>upregulated</b> |
| <b>Lep</b>           | <b>6639.40122</b> | <b>7.78243891</b>  | <b>0.80491122</b> | <b>9.66869225</b> | <b>4.0958E-22</b> | <b>8.8054E-20</b> | <b>upregulated</b> |
| <i>Slc2a5</i>        | 353.175461        | 6.60632428         | 1.35415758        | 4.87854911        | 1.0687E-06        | 1.0717E-05        | upregulated        |
| <i>Fpr1</i>          | 323.351452        | 6.56658049         | 1.42605491        | 4.60471784        | 4.1303E-06        | 3.4666E-05        | upregulated        |
| <i>Alb</i>           | 450.504986        | 6.43586345         | 0.54351805        | 11.8411217        | 2.3923E-32        | 2.3144E-29        | upregulated        |
| <i>Sncg</i>          | 15023.3037        | 6.23226359         | 0.34513761        | 18.0573299        | 6.9084E-73        | 1.1362E-68        | upregulated        |
| <i>Pnpla3</i>        | 5753.84419        | 6.20018137         | 0.73360627        | 8.45164721        | 2.8722E-17        | 2.9803E-15        | upregulated        |
| <i>Areg</i>          | 1544.70625        | 6.18068349         | 1.2612098         | 4.90059899        | 9.5545E-07        | 9.7209E-06        | upregulated        |
| <b>Scd1</b>          | <b>672756.834</b> | <b>6.14968158</b>  | <b>0.68303094</b> | <b>9.00351835</b> | <b>2.186E-19</b>  | <b>3.1957E-17</b> | <b>upregulated</b> |
| <i>Upk3a</i>         | 107.441587        | 6.04186451         | 1.76080707        | 3.4313041         | 0.00060069        | 0.00262152        | upregulated        |
| <i>Mup10</i>         | 134.373557        | 6.02375742         | 1.1716738         | 5.1411557         | 2.7305E-07        | 3.2518E-06        | upregulated        |
| <i>Mup22</i>         | 133.025014        | 6.00902777         | 1.16948656        | 5.13817599        | 2.7742E-07        | 3.2966E-06        | upregulated        |
| <i>Hamp2</i>         | 65.2044088        | -5.37225207        | 0.74256854        | -7.23468845       | 4.666E-13         | 2.1832E-11        | downregulated      |
| <i>Ighv1-49</i>      | 66.5498465        | -4.50562545        | 0.86899177        | -5.18488852       | 2.1614E-07        | 2.6519E-06        | downregulated      |
| <i>Ighe</i>          | 1259.95447        | -3.86656127        | 0.98426646        | -3.9283684        | 8.5524E-05        | 0.00048245        | downregulated      |
| <i>Igkv11-125</i>    | 65.3703606        | -2.95852355        | 0.7937741         | -3.72716059       | 0.00019365        | 0.00097307        | downregulated      |
| <i>Apoc3</i>         | 59.3517823        | -2.90471797        | 0.68151176        | -4.26216855       | 2.0245E-05        | 0.00013736        | downregulated      |
| <i>A530030E21Rik</i> | 145.876251        | -2.8646756         | 0.23770678        | -12.0512993       | 1.9092E-33        | 2.0257E-30        | downregulated      |
| <i>Gm18748</i>       | 63.5887462        | -2.72271781        | 0.49317453        | -5.52079975       | 3.3746E-08        | 5.0941E-07        | downregulated      |
| <i>Gm47782</i>       | 203.285799        | -2.71880525        | 0.44753582        | -6.07505621       | 1.2394E-09        | 2.7125E-08        | downregulated      |
| <i>Gm31804</i>       | 270.517933        | -2.70462141        | 0.42806294        | -6.3182797        | 2.6449E-10        | 6.7389E-09        | downregulated      |
| <i>Abca13</i>        | 55.4327726        | -2.6672388         | 0.48798094        | -5.46586673       | 4.6065E-08        | 6.7283E-07        | downregulated      |
| <i>Ptgds</i>         | 62.7145289        | -2.65517546        | 0.49570735        | -5.35633664       | 8.4926E-08        | 1.163E-06         | downregulated      |
| <i>Gm12490</i>       | 63.6375533        | -2.62447864        | 0.42457837        | -6.18137625       | 6.3545E-10        | 1.4814E-08        | downregulated      |
| <i>Gm47780</i>       | 241.250346        | -2.62399536        | 0.46867817        | -5.59871464       | 2.1595E-08        | 3.4431E-07        | downregulated      |
| <i>Olfr109</i>       | 217.333967        | -2.49909268        | 0.37270234        | -6.70533142       | 2.0095E-11        | 6.7724E-10        | downregulated      |
| <i>Mir142b</i>       | 76.7799563        | -2.48147157        | 0.45053798        | -5.50779663       | 3.6335E-08        | 5.4475E-07        | downregulated      |

Noteworthy genes are highlighted in red.

BaseMean = the average of the normalized counts taken over all samples / lfcSE = standard error of the log2FoldChange estimate/stat = Wald statistic / pvalue = Wald test p-value / padj = Benjamini-Hochberg adjusted p-value<sup>1</sup>.

**Supplementary Table S5. RNAseq Top 15 DEGs from DESeq2 of CB-100 treated versus sham-treated NOD Mouse's BAT. Related to Figure 3J.**

| Gene Symbol           | BaseMean          | log2 FoldChange    | lfcSE              | stat               | pvalue             | padj               | Note               |
|-----------------------|-------------------|--------------------|--------------------|--------------------|--------------------|--------------------|--------------------|
| <i>Fosb</i>           | 377.940493        | 5.423568265        | 1.630662935        | 3.325989785        | 0.000881052        | 0.014228774        | upregulated        |
| <b><i>Scd1</i></b>    | <b>43378.4807</b> | <b>4.404576517</b> | <b>0.502375191</b> | <b>8.767504048</b> | <b>1.8267E-18</b>  | <b>4.4462E-15</b>  | <b>upregulated</b> |
| <i>Egr3</i>           | 193.339786        | 4.170345034        | 1.138303094        | 3.663650792        | 0.000248646        | 0.005892108        | upregulated        |
| <b><i>Gm44502</i></b> | <b>147.105008</b> | <b>3.430936505</b> | <b>0.600836449</b> | <b>5.710266926</b> | <b>1.12799E-08</b> | <b>2.66927E-06</b> | <b>upregulated</b> |
| <b><i>Dio2</i></b>    | <b>1536.95743</b> | <b>3.073423038</b> | <b>1.144592535</b> | <b>2.685167816</b> | <b>0.00724934</b>  | <b>0.060724803</b> | <b>upregulated</b> |
| <i>Gm38357</i>        | 480.556497        | 3.009943113        | 0.745179096        | 4.039221079        | 5.3629E-05         | 0.001887874        | upregulated        |
| <i>Fos</i>            | 424.388827        | 2.951669149        | 1.39495136         | 2.115965642        | 0.03434773         | 0.16517545         | upregulated        |
| <i>Slco4a1</i>        | 133.237886        | 2.825701883        | 0.963917187        | 2.931477849        | 0.003373534        | 0.036218196        | upregulated        |
| <i>Fndc5</i>          | 65.938467         | 2.644053492        | 0.656213661        | 4.029257007        | 5.59534E-05        | 0.001957565        | upregulated        |
| <i>Akap5</i>          | 142.150916        | 2.628803173        | 0.313919397        | 8.374134244        | 5.56313E-17        | 1.05316E-13        | upregulated        |
| <i>Gk</i>             | 1773.065          | 2.573316009        | 0.462775949        | 5.560608789        | 2.68835E-08        | 5.45287E-06        | upregulated        |
| <i>A830018L16Rik</i>  | 183.331672        | 2.515879267        | 0.52175858         | 4.82192218         | 1.42181E-06        | 0.000114015        | upregulated        |
| <i>S100b</i>          | 336.242184        | 2.490030416        | 0.423136754        | 5.884694227        | 3.98791E-09        | 1.23538E-06        | upregulated        |
| <i>Gm43605</i>        | 122.466743        | 2.467060482        | 0.561606957        | 4.392859542        | 1.11869E-05        | 0.000552473        | upregulated        |
| <i>Gm42613</i>        | 51.4196396        | 2.441051139        | 0.56734788         | 4.302565015        | 1.68832E-05        | 0.000775286        | upregulated        |
| <i>Gm45061</i>        | 548.29461         | -3.843311266       | 0.486025033        | -7.90764057        | 2.62313E-15        | 4.06299E-12        | downregulated      |
| <i>Otof</i>           | 145.001663        | -3.829071067       | 1.257713583        | -3.044469837       | 0.002330908        | 0.027768239        | downregulated      |
| <i>Cyp2b10</i>        | 809.7713          | -3.778733581       | 0.762610567        | -4.954997669       | 7.23312E-07        | 6.52052E-05        | downregulated      |
| <i>Chrn4</i>          | 52.0726661        | -3.728396563       | 1.523326905        | -2.447535424       | 0.014383699        | 0.094914584        | downregulated      |
| <i>Itih4</i>          | 137.694373        | -3.51309137        | 0.902616415        | -3.892119967       | 9.93721E-05        | 0.002982145        | downregulated      |
| <i>Zim1</i>           | 682.570621        | -3.441861698       | 0.478980903        | -7.185801513       | 6.68141E-13        | 7.11486E-10        | downregulated      |
| <i>Gm45060</i>        | 132.597611        | -3.383178152       | 0.358909528        | -9.426270106       | 4.24931E-21        | 2.41333E-17        | downregulated      |
| <i>Gm16143</i>        | 60.2954912        | -3.222388937       | 0.462843773        | -6.962152515       | 3.35112E-12        | 2.48245E-09        | downregulated      |
| <i>BB365896</i>       | 1183.13087        | -3.047122329       | 0.774020225        | -3.936747687       | 8.25934E-05        | 0.002586812        | downregulated      |
| <i>Mycl</i>           | 297.128494        | -2.999406415       | 0.550259653        | -5.450892858       | 5.01176E-08        | 8.63586E-06        | downregulated      |
| <i>D630039A03Rik</i>  | 68.4987102        | -2.973999314       | 1.189594744        | -2.500010469       | 0.012418964        | 0.086271408        | downregulated      |
| <i>Cpne9</i>          | 182.564779        | -2.824471637       | 0.495642026        | -5.698612077       | 1.20787E-08        | 2.78103E-06        | downregulated      |
| <i>Tmem132b</i>       | 125.969361        | -2.797054301       | 0.90575213         | -3.088101266       | 0.002014398        | 0.025219015        | downregulated      |
| <i>Hmgcs2</i>         | 154.102529        | -2.716866552       | 0.602274369        | -4.51101141        | 6.45192E-06        | 0.000382662        | downregulated      |
| <i>Aldoc</i>          | 90.026831         | -2.696693801       | 0.290174448        | -9.293353778       | 1.49502E-20        | 5.09442E-17        | downregulated      |

Noteworthy genes are highlighted in red.

BaseMean = the average of the normalized counts taken over all samples / lfcSE = standard error of the log2FoldChange estimate/stat = Wald statistic / pvalue = Wald test p-value / padj = Benjamini-Hochberg adjusted p-value<sup>1</sup>.

**Supplementary Table S6. Detailed information for key resources**

| REAGENT or RESOURCE                                          | SOURCE         | IDENTIFIER                          |
|--------------------------------------------------------------|----------------|-------------------------------------|
| <b>Antibodies</b>                                            |                |                                     |
| Akt (pan) (40D4) Mouse mAb                                   | Cell Signaling | Cat# 2920<br>RRID: AB_1147620       |
| Anti-phospho-IRS1 (Tyr608) mouse/<br>(Tyr612) human Antibody | Sigma-Aldrich  | Cat# 09-432<br>RRID: AB_1163457     |
| a-sarcoglycan Antibody (F-7)                                 | Santa Cruz     | Cat# sc-390647                      |
| CD68 antibody                                                | Abcam          | Cat# ab125212<br>RRID: AB_10975465  |
| GAPDH antibody                                               | ProteinTech    | Cat# 10494-1-AP<br>RRID: AB_2263076 |
| Glucagon Antibody                                            | AvantGen       | Cat# GLUN F7                        |
| GLUT4 Polyclonal Antibody                                    | Invitrogen     | Cat# PA5-23052<br>RRID: AB_11153908 |
| Goat Anti-Mouse IgG (H L)-HRP<br>Conjugate                   | Bio-Rad        | Cat # 172-1011<br>RRID: AB_11125936 |

|                                                            |                                                                 |                                      |
|------------------------------------------------------------|-----------------------------------------------------------------|--------------------------------------|
| Goat Anti-Rabbit IgG (H+L)-HRP Conjugate                   | Bio-Rad                                                         | Cat# 1721019<br>RRID: AB_11125143    |
| Human/Mouse Somatostatin Antibody                          | Biotechne R&D Systems                                           | Cat# MAB2358<br>RRID: AB_2722572     |
| Insulin Antibody (2D11-H5)                                 | Santa Cruz                                                      | Cat# sc-8033<br>RRID: AB_627285      |
| IRDye® 680RD Goat anti-Rabbit IgG Secondary Antibody       | LI-COR                                                          | Cat# 926-68071<br>RRID: AB_10956166  |
| IRS-1 (59G8) Rabbit mAb                                    | Cell Signaling                                                  | Cat# 2390<br>RRID: AB_10692516       |
| Nidogen-2 Antibody                                         | ProteinTech                                                     | Cat# 13530-1-AP<br>RRID: AB_10598468 |
| Phospho-Akt (Ser473) (D9E) XP® Rabbit mAb                  | Cell Signaling                                                  | Cat # 4060<br>RRID: AB_2315049       |
| UCP1                                                       | Abcam                                                           | Cat# ab234430<br>RRID: AB_2905638    |
| <b>Biological samples</b>                                  |                                                                 |                                      |
| Human Islets (non-diabetic, Type 2 diabetic). See Table S1 | Integrated Islet Distribution Program (IIDP)                    | N/A                                  |
| Human islets (type 1 diabetic). See Table S1               | Laboratory of Al Powers in Vanderbilt University Medical Center | N/A                                  |
| <b>Chemicals, peptides, and recombinant proteins</b>       |                                                                 |                                      |
| 3,3', 5-Triiodo-L-thyronine sodium salt hydrate (T3)       | Sigma-Aldrich                                                   | Cat# T6397                           |
| 3-Isobutyl-1-methylxanthine (IBMX)                         | Sigma-Aldrich                                                   | Cat# I7018                           |
| 6x Laemmli SDS sample buffer                               | Bioland Scientific                                              | Cat# SAB0301                         |
| Accutase                                                   | Innovative Cell Technologies                                    | Cat# 07920                           |
| Adomeglivant                                               | MedChemExpress                                                  | Cat# HY-19904/CS-5729                |
| Antibiotic-Antimycotic (100X)                              | Thermo Fisher                                                   | Cat # 15240062                       |
| Collagenase P                                              | Roche                                                           | Cat# 11 213 873 001                  |
| CYN 154806                                                 | TOCRIS                                                          | Cat# 1843                            |
| Dexamethasone (water soluble)                              | Sigma-Aldrich                                                   | Cat# D2915                           |
| Diva Decloaker                                             | Biocare Medical                                                 | Cat# DV2004                          |
| DMEM Medium                                                | Gibco                                                           | Cat# 11885-084                       |
| DMEM/F-12 medium                                           | Gibco                                                           | Cat# 10565-018                       |
| Exendin-3                                                  | APExBIO                                                         | Cat# B6943                           |
| HBSS                                                       | Gibco                                                           | Cat# 14025-076                       |
| Histopaque 1077                                            | Sigma-Aldrich                                                   | Cat# 10771                           |
| Histopaque 1119                                            | Sigma-Aldrich                                                   | Cat# 11191                           |
| Humulin R                                                  | Lilly                                                           | Cat# HI-213                          |
| Indomethacin                                               | Sigma-Aldrich                                                   | Cat# I7378                           |

|                                                                              |                             |                                    |
|------------------------------------------------------------------------------|-----------------------------|------------------------------------|
| Insulin                                                                      | Sigma-Aldrich               | Cat# I19278                        |
| KYL                                                                          | TOCRIS                      | Cat# 5290                          |
| Lipofectamine RNAiMAX                                                        |                             | Cat# 13778075                      |
| Nidogen2                                                                     | Biotechne R&D Systems       | Cat# 6760-ND                       |
| Prime Western Blotting Detection Reagent                                     | Cytiva Amersham™ ECL™       | Cat # 45-002-401                   |
| ProLong Glass Antifade Mountant                                              | Invitrogen                  | Cat# P36982                        |
| Protein standard mix 15-600kDa for testing of SEC/GFC columns                | Sigma-Aldrich               | Cat# 69385                         |
| Rh-Laminin 521                                                               | Gibco                       | Cat# A29249                        |
| RPMI 1640 medium                                                             | Gibco                       | Cat# 11879-020                     |
| S961                                                                         | Phoenix Pharmaceuticals inc | Cat# 051-86                        |
| TRIzol Reagent                                                               | Invitrogen                  | Cat# 15596026                      |
| Western Blotting Detection Reagents                                          | Cytiva Amersham™ ECL™       | Cat # 45-000-875                   |
| <b>Critical commercial assays</b>                                            |                             |                                    |
| Glucagon ELISA Kit                                                           | Crystal Chem                | Cat# 81518                         |
| Glucagon Immunoassay                                                         | Promega                     | Cat# W8020                         |
| Glucose assay kit (fluorometric, high sensitivity)                           | Abcam                       | Cat# AB169559                      |
| Insulin Immunoassay                                                          | Promega                     | Cat# CS3037A01                     |
| TriFECTa RNAi Kit                                                            | Integrated DNA Technology   | N/A                                |
| Ultra-sensitive Mouse Insulin ELISA Kit                                      | Crystal Chem                | Cat# 90080                         |
| <b>Deposited data</b>                                                        |                             |                                    |
| proteomic Raw Data Files                                                     | This publication            | PXD051972                          |
| Brown adipose tissue CB-100 treated vs. sham RNA-seq Raw Data Files          | This publication            | GSE265915                          |
| inguinal white adipose tissue CB-100 treated vs. sham RNA-seq Raw Data Files | This publication            | GSE265914                          |
| <b>Experimental models: Cell lines</b>                                       |                             |                                    |
| 3T3-L1                                                                       | ATCC                        | Cat# CL-173<br>RRID: CVCL_0123     |
| Alpha TC1 clone 6                                                            | ATCC                        | Cat# CRL-2934<br>RRID: CVCL_B036   |
| AML12                                                                        | ATCC                        | Cat# CRL-2254<br>RRID: CVCL_0140   |
| C2C12                                                                        | ATCC                        | Cat# CRL-1772<br>RRID: CVCL_0188   |
| imBAT                                                                        | Rosell et al <sup>2</sup>   | N/A                                |
| L6-GLUT4myc Rat Myoblast Cell Line                                           | Kerafast                    | Cat # ESK202-FP<br>RRID: CVCL_0P25 |

|                                                                                                                                                                                                          |                                                    |                                             |
|----------------------------------------------------------------------------------------------------------------------------------------------------------------------------------------------------------|----------------------------------------------------|---------------------------------------------|
| Experimental models: Organisms/strains                                                                                                                                                                   |                                                    |                                             |
| C57BL/6                                                                                                                                                                                                  | Jackson Laboratory                                 | Cat# 000664<br>RRID: IMSR_JAX:000664        |
| GCGCre-RFP                                                                                                                                                                                               | Marchand and Piston <sup>3</sup>                   | N/A                                         |
| NOD/ShiLtJ                                                                                                                                                                                               | Jackson Laboratory                                 | Cat# 001976<br>RRID: IMSR_JAX:001976        |
| Oligonucleotides                                                                                                                                                                                         |                                                    |                                             |
| Primer for <i>18S</i> , <i>Cidea</i> , <i>Cxcl14</i> , <i>Glut4</i> , <i>Nid2</i> , <i>Prdm16</i> , <i>Rbp4</i> , <i>Tbx1</i> , <i>Tmem26</i> , <i>Trarg1</i> , <i>Ucp1</i> , <i>Zic1</i> - See Table S3 | This paper                                         | N/A                                         |
| DsiRNA_Nid2 13.1 & 13.2 (for nidogen-2 knockdown)                                                                                                                                                        | Integrated DNA Technologies                        | Cat# mm.Ri.Nid2.13.1 & Cat# mm.Ri.Nid2.13.2 |
| Software and algorithms                                                                                                                                                                                  |                                                    |                                             |
| DIA-NN                                                                                                                                                                                                   | Kistner, Grossmann, Sinn and Demichev <sup>4</sup> | 1.8.2 beta 27                               |
| Image Studio                                                                                                                                                                                             | LI-COR                                             | Ver5.2                                      |
| ImageJ                                                                                                                                                                                                   | NIH                                                | Java 1.8.0_172                              |
| MATLAB                                                                                                                                                                                                   | MathWorks                                          | R2021b                                      |
| Orbitrap Eclipse                                                                                                                                                                                         | Thermo Fisher Scientific                           | N/A                                         |
| Prism                                                                                                                                                                                                    | GraphPad                                           | 10.1.2                                      |
| QuantUMS                                                                                                                                                                                                 | Kistner, Grossmann, Sinn and Demichev <sup>4</sup> | N/A                                         |
| R Studio                                                                                                                                                                                                 | Posit                                              | R version 4.2.1                             |
| Scaffold4 Viewer                                                                                                                                                                                         | Scaffold                                           | Ver 4.11.1                                  |
| SwissProt proteome                                                                                                                                                                                       | Expasy                                             | N/A                                         |
| Zen                                                                                                                                                                                                      | Zeiss                                              | Zen 3.5                                     |
| Other                                                                                                                                                                                                    |                                                    |                                             |
| μPAC™ Trapping column                                                                                                                                                                                    | PharmaFluidics                                     | N/A                                         |
| 50 cm μPAC™ column                                                                                                                                                                                       | PharmaFluidics                                     | N/A                                         |
| Amicon Stirred Cells system                                                                                                                                                                              | Milipore Sigma                                     | Cat#UFSC40001                               |
| C18 ZipTips                                                                                                                                                                                              | Milipore Sigma                                     | N/A                                         |
| Capto Q resin                                                                                                                                                                                            | Cytiva                                             | Cat#17531602                                |
| HiScale 26/20                                                                                                                                                                                            | Cytiva                                             | Cat#28964514                                |
| LSM 880 confocal microscope                                                                                                                                                                              | Zeiss                                              | LSM 880                                     |
| NTA ZetaView                                                                                                                                                                                             | Analytik                                           | N/A                                         |
| Optima LE-80K                                                                                                                                                                                            | Beckman Coulter                                    | 8043-30-1192                                |
| RSLCnano Ultimate 3000                                                                                                                                                                                   | Thermo Fisher Scientific                           | N/A                                         |
| Superdex 200 Increase 10/300 GL                                                                                                                                                                          | Cytiva                                             | Cat#28990944                                |
| μPAC™ Trapping column                                                                                                                                                                                    | PharmaFluidics                                     | N/A                                         |
| 50 cm μPAC™ column                                                                                                                                                                                       | PharmaFluidics                                     | N/A                                         |
| Amicon Stirred Cells system                                                                                                                                                                              | Milipore Sigma                                     | Cat#UFSC40001                               |
| C18 ZipTips                                                                                                                                                                                              | Milipore Sigma                                     | N/A                                         |
| Capto Q resin                                                                                                                                                                                            | Cytiva                                             | Cat#17531602                                |

|                                         |                          |              |
|-----------------------------------------|--------------------------|--------------|
| HiScale 26/20                           | Cytiva                   | Cat#28964514 |
| Airyscan Two-photon confocal microscope | Zeiss                    | LSM880       |
| NTA ZetaView                            | Analytik                 | N/A          |
| Optima LE-80K                           | Beckman Coulter          | 8043-30-1192 |
| RSLCnano Ultimate 3000                  | Thermo Fisher Scientific | N/A          |
| Superdex 200 Increase 10/300 GL         | Cytiva                   | Cat#28990944 |

## References

1. Love, M.I., Huber, W., and Anders, S. (2014). Moderated estimation of fold change and dispersion for RNA-seq data with DESeq2. *Genome Biol.* *15*, 550. <https://doi.org/10.1186/s13059-014-0550-8>.
2. Rosell, M., Kaforou, M., Frontini, A., Okolo, A., Chan, Y.-W., Nikolopoulou, E., Millership, S., Fenech, M.E., MacIntyre, D., Turner, J.O., et al. (2014). Brown and white adipose tissues: intrinsic differences in gene expression and response to cold exposure in mice. *Am. J. Physiol. Endocrinol. Metab.* *306*, E945-964. <https://doi.org/10.1152/ajpendo.00473.2013>.
3. Le Marchand, S.J., and Piston, D.W. (2010). Glucose suppression of glucagon secretion: metabolic and calcium responses from alpha-cells in intact mouse pancreatic islets. *J. Biol. Chem.* *285*, 14389–14398. <https://doi.org/10.1074/jbc.M109.069195>.
4. Kistner, F., Grossmann, J.L., Sinn, L.R., and Demichev, V. (2023). QuantUMS: uncertainty minimisation enables confident quantification in proteomics. Preprint at bioRxiv, <https://doi.org/10.1101/2023.06.20.545604> <https://doi.org/10.1101/2023.06.20.545604>.
