# Supplementary material
Source: publisher figshare collection journal article supplement (https://diabetesjournals.figshare.com/articles/dataset/_/28500572)
Supplement: Supplementary file 3 [file 1]

|                                                        |  |  |  |  |  |  |  |  |
|--------------------------------------------------------|--|--|--|--|--|--|--|--|
| Glucose-lowering therapy at time of death <sup>c</sup> |  |  |  |  |  |  |  |  |
|--------------------------------------------------------|--|--|--|--|--|--|--|--|

*Continues on the next page*

| Islet preparation                                                           | 9                     | 10                    | 11                     | 12                     | 13                     | 14                     | 15                     | 16                     |
|-----------------------------------------------------------------------------|-----------------------|-----------------------|------------------------|------------------------|------------------------|------------------------|------------------------|------------------------|
| <b>MANDATORY INFORMATION</b>                                                |                       |                       |                        |                        |                        |                        |                        |                        |
| Unique identifier                                                           | SAMN37973608          | SAMN37871873          | SAMN36823227           | SAMN35301006           | SAMN34411471           | SAMN34033793           | SAMN33103085           | SAMN34033793           |
| Donor age (years)                                                           | 55                    | 59                    | 41                     | 52                     | 45                     | 39                     | 49                     | 39                     |
| Donor sex (M/F)                                                             | Female                | Male                  | Female                 | Male                   | Male                   | Male                   | Female                 | Male                   |
| Donor BMI (kg/m <sup>2</sup> )                                              | 31.7                  | 41.7                  | 38.4                   | 31.6                   | 33.1                   | 33.4                   | 27.5                   | 33.4                   |
| Donor HbA <sub>1c</sub>                                                     | 5.9%<br>(41 mmol/mol) | 5.4%<br>(36 mmol/mol) | 5.20%<br>(33 mmol/mol) | 4.40%<br>(25 mmol/mol) | 5.20%<br>(33 mmol/mol) | 5.00%<br>(31 mmol/mol) | 5.20%<br>(33 mmol/mol) | 5.00%<br>(31 mmol/mol) |
| Origin/source of islets <sup>b</sup>                                        | IIDP                  | IIDP                  | IIDP                   | IIDP                   | IIDP                   | IIDP                   | IIDP                   | IIDP                   |
| Islet isolation centre                                                      | SC-ICRC               | VCU                   | Wisconsin              | Imagine                | Wisconsin              | SC-ICRC                | Imagine                | SC-ICRC                |
| Donor history of diabetes?<br>Please select yes/no from drop down list      | No                    | No                    | No                     | No                     | No                     | No                     | No                     | No                     |
| <b>If Yes, complete the next two lines if this information is available</b> |                       |                       |                        |                        |                        |                        |                        |                        |

|                                                        |  |  |  |  |  |  |  |  |
|--------------------------------------------------------|--|--|--|--|--|--|--|--|
| Diabetes duration (years)                              |  |  |  |  |  |  |  |  |
| Glucose-lowering therapy at time of death <sup>c</sup> |  |  |  |  |  |  |  |  |

| Islet preparation                                                           | 17                          | 18                    | 19                    | 20                       | 21                    | 22                     | 23                     | 24                     |
|-----------------------------------------------------------------------------|-----------------------------|-----------------------|-----------------------|--------------------------|-----------------------|------------------------|------------------------|------------------------|
| <b>MANDATORY INFORMATION</b>                                                |                             |                       |                       |                          |                       |                        |                        |                        |
| Unique identifier                                                           | UNOSIDAKE4447/<br>nPOD 6594 | SAMN37680485          | SAMN36020139          | SAMN33293779             | SAMN25980818          | SAMN39639181           | SAMN32273466           | SAMN40122446           |
| Donor age (years)                                                           | 27                          | 63                    | 46                    | 49                       | 55                    | 58                     | 45                     | 63                     |
| Donor sex (M/F)                                                             | Male                        | male                  | Female                | Male                     | Male                  | Male                   | Female                 | Male                   |
| Donor BMI (kg/m <sup>2</sup> )                                              | 29.79                       | 33.9                  | 27.5                  | 68.5                     | 31                    | 38.3                   | 33.5                   | 36                     |
| Donor HbA <sub>1c</sub>                                                     | 12.3%<br>(111 mmol/mol)     | 6.7%<br>(50 mmol/mol) | 8.3%<br>(67 mmol/mol) | 11.50%<br>(102 mmol/mol) | 6.5%<br>(48 mmol/mol) | 6.20%<br>(44 mmol/mol) | 6.50%<br>(48 mmol/mol) | 7.00%<br>(53 mmol/mol) |
| Origin/source of islets <sup>b</sup>                                        | nPOD                        | IIDP                  | IIDP                  | IIDP                     | IIDP                  | IIDP                   | IIDP                   | IIDP                   |
| Islet isolation centre                                                      | Imagine Pharma              | SC-ICRC               | Imagine               | Imagine                  | Prodo Labs            | SC-ICRC                | Imagine                | SC-ICRC                |
| Donor history of diabetes?<br>Please select yes/no from drop down list      | Yes                         | Yes                   | Yes                   | Yes                      | Yes                   | Yes                    | Yes                    | Yes                    |
| <b>If Yes, complete the next two lines if this information is available</b> |                             |                       |                       |                          |                       |                        |                        |                        |
| Diabetes duration (years)                                                   | 10                          | >10                   | 0-5                   | Unknown                  | 0-5                   | 6-10                   | Unknown                | >10                    |
| Glucose-lowering therapy at time of death <sup>c</sup>                      | Metformin and Lantus        | Yes – 8.0 Units       | Yes – 8.0 Units       | Yes - -8.0 Units         | No                    | Yes - 25.0 Unit        | Yes - -8.0 Units       | Yes - -2.0 Units       |

|                                                                             |                         |                        |  |  |  |  |  |  |
|-----------------------------------------------------------------------------|-------------------------|------------------------|--|--|--|--|--|--|
| <b>Islet preparation</b>                                                    | <b>25</b>               | <b>26</b>              |  |  |  |  |  |  |
| <b>MANDATORY INFORMATION</b>                                                |                         |                        |  |  |  |  |  |  |
| Unique identifier                                                           | SAMN39243818            | SAMN40593976           |  |  |  |  |  |  |
| Donor age (years)                                                           | 68                      | 43                     |  |  |  |  |  |  |
| Donor sex (M/F)                                                             | Male                    | Male                   |  |  |  |  |  |  |
| Donor BMI (kg/m <sup>2</sup> )                                              | 25.2                    | 29.8                   |  |  |  |  |  |  |
| Donor HbA <sub>1c</sub>                                                     | 10.70%<br>(93 mmol/mol) | 6.70%<br>(50 mmol/mol) |  |  |  |  |  |  |
| Origin/source of islets <sup>b</sup>                                        | IIDP                    | IIDP                   |  |  |  |  |  |  |
| Islet isolation centre                                                      | NCHIBC                  | SC-ICRC                |  |  |  |  |  |  |
| Donor history of diabetes? Please select yes/no from drop down list         | Yes                     | Yes                    |  |  |  |  |  |  |
| <b>If Yes, complete the next two lines if this information is available</b> |                         |                        |  |  |  |  |  |  |
| Diabetes duration (years)                                                   | >10                     | Unknown                |  |  |  |  |  |  |
| Glucose-lowering therapy at time of death <sup>c</sup>                      | No                      | Unknown                |  |  |  |  |  |  |
